# Supplementary material
Source: PubMed Central journal article supplement (PMC149879)

### IL2 N30C Tether Hits

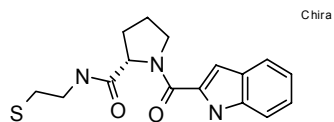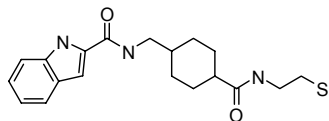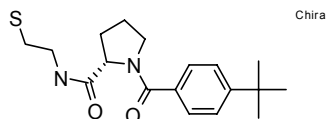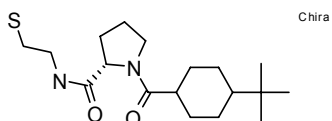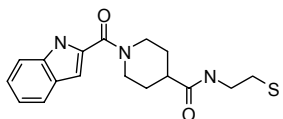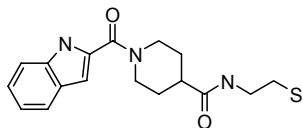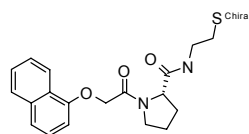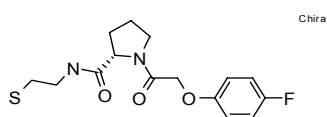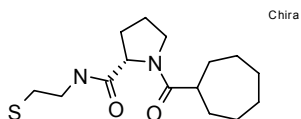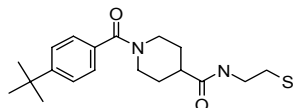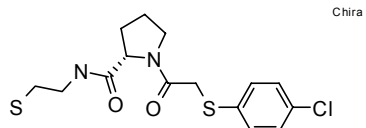

### IL2 N30C Tether Hits

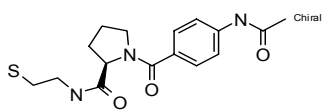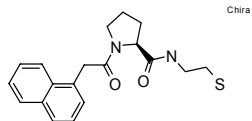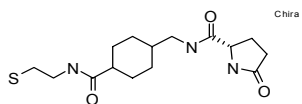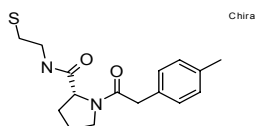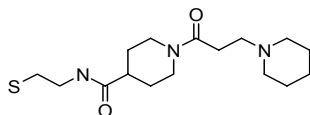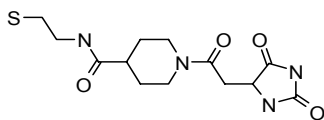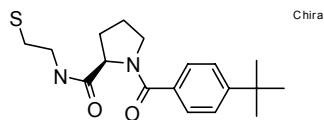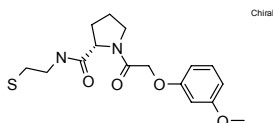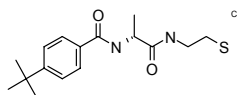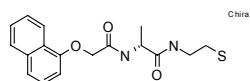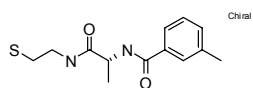

### IL2 N30C Tether Hits

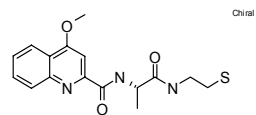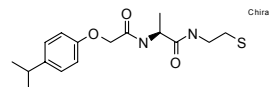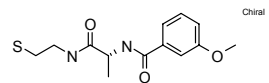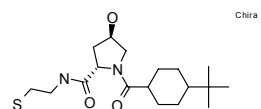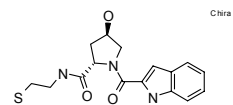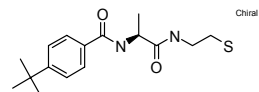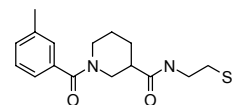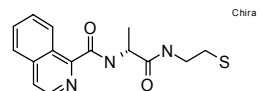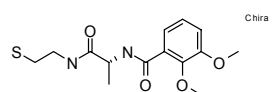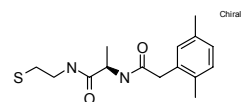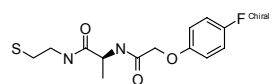

### IL2 N30C Tether Hits

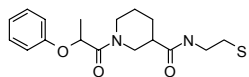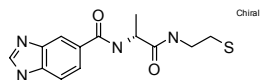

Chiral

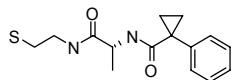

Chiral

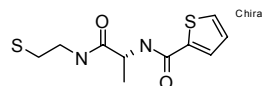

Chiral

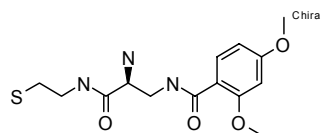

Chiral

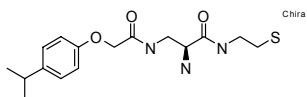

Chiral

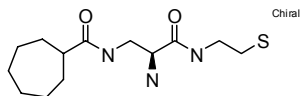

Chiral

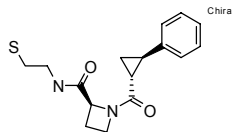

Chiral

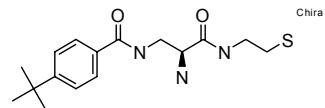

Chiral

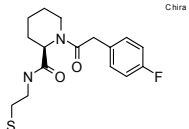

Chiral

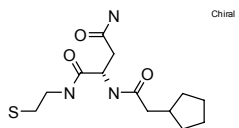

Chiral

### IL2 N30C Tether Hits

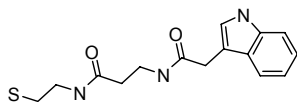

Chiral

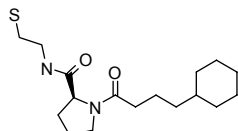

Chiral

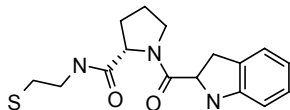

Chiral

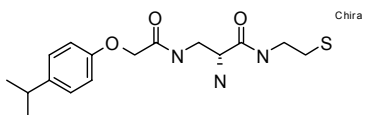

Chiral

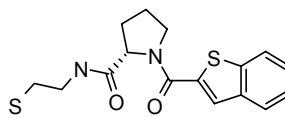

Chiral

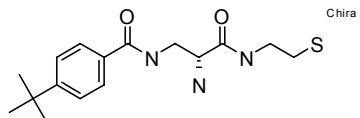

Chiral

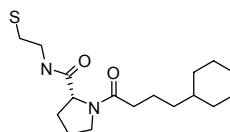

Chiral

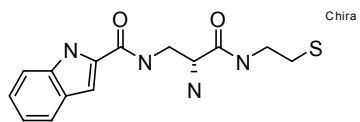

Chiral

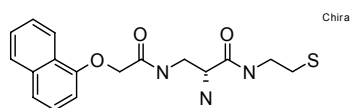

Chiral

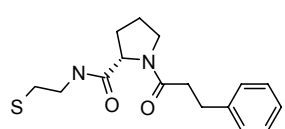

Chiral

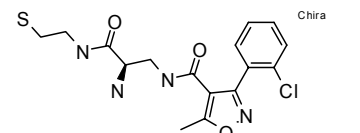

### IL2 N30C Tether Hits

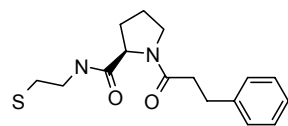

Chiral

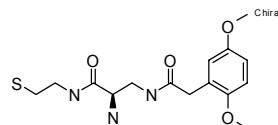

Chiral

### IL2 Y31C Tether Hits

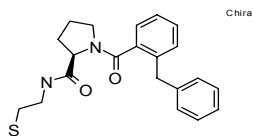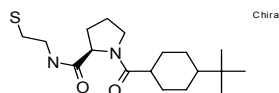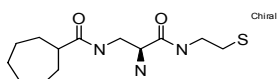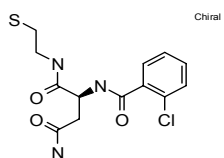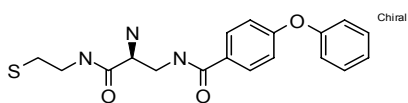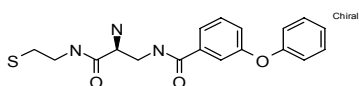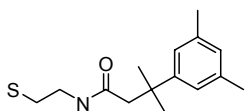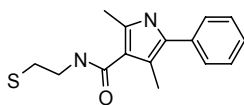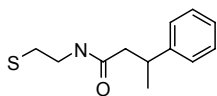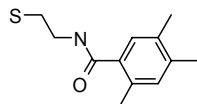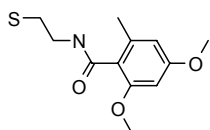

### IL2 Y31C Tether Hits

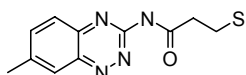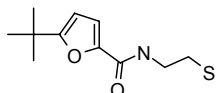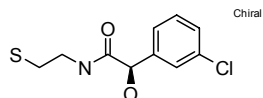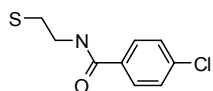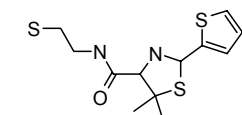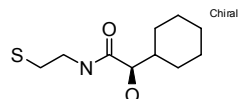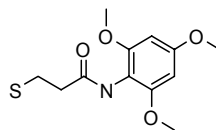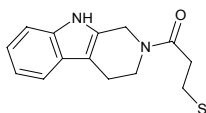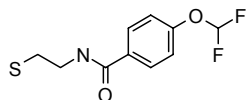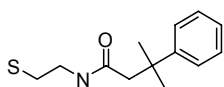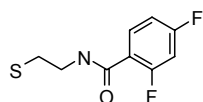

### IL2 Y31C Tether Hits

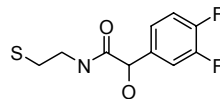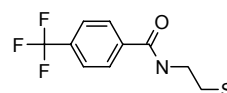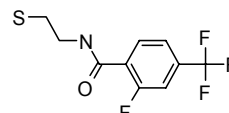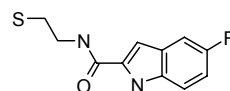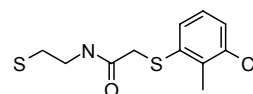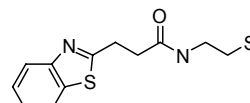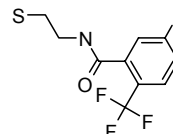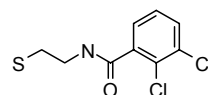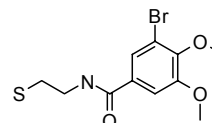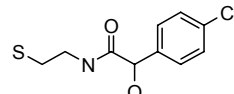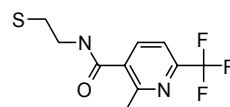

### IL2 Y31C Tether Hits

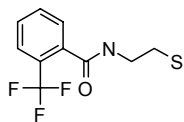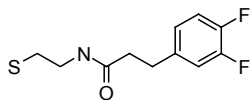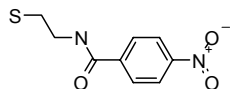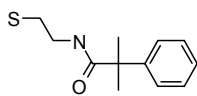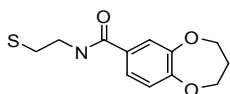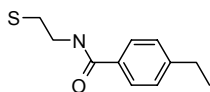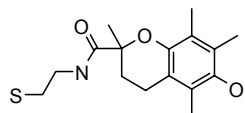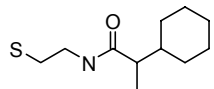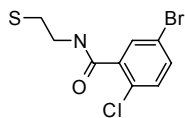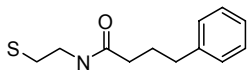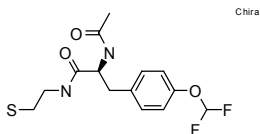

### IL2 Y31C Tether Hits

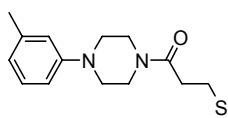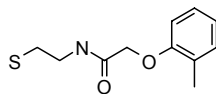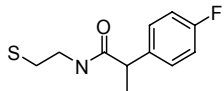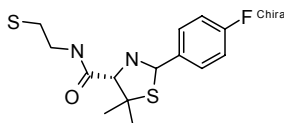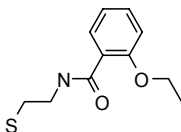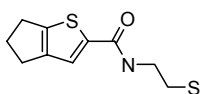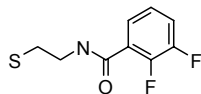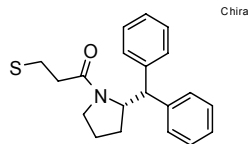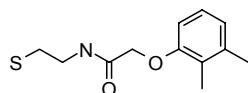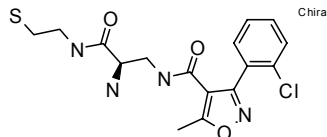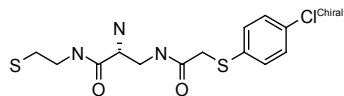

### IL2 Y31C Tether Hits

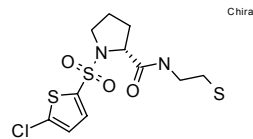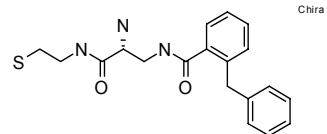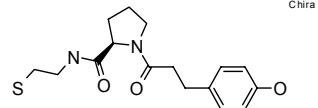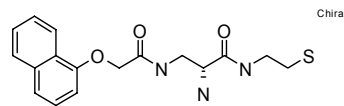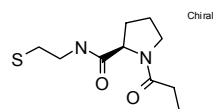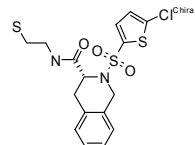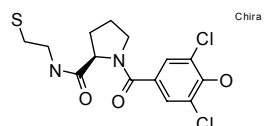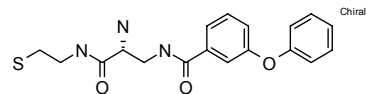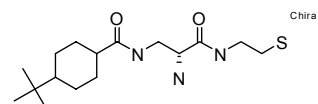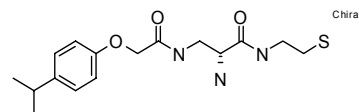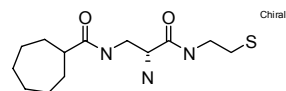

## IL2 Y31C Tether Hits

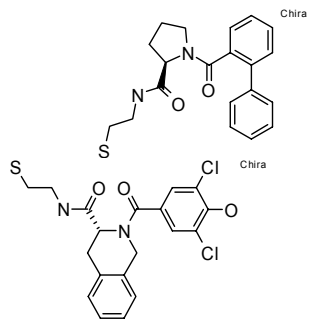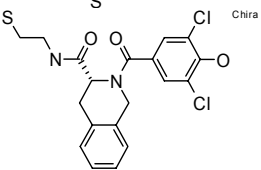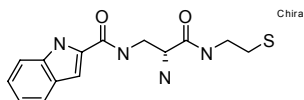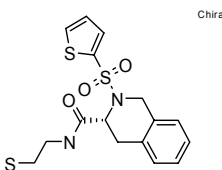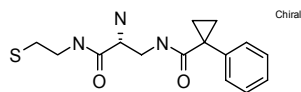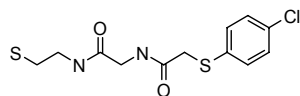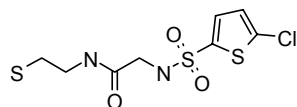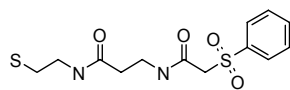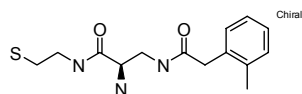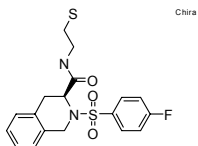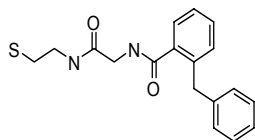

## IL2 Y31C Tether Hits

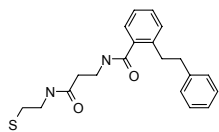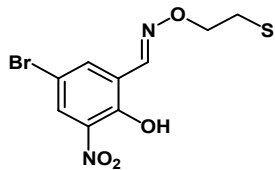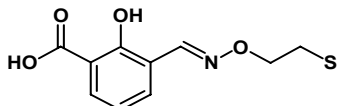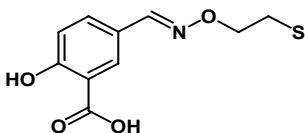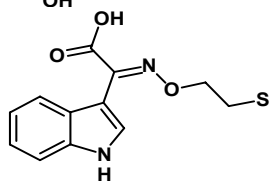

## IL2 K32C Tether Hits

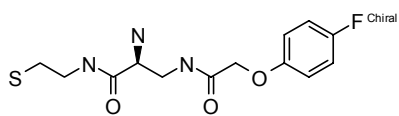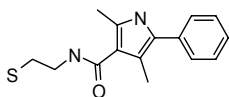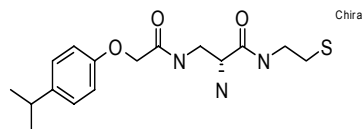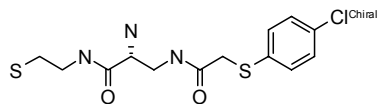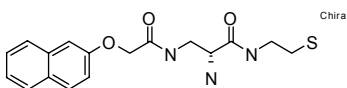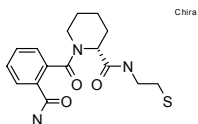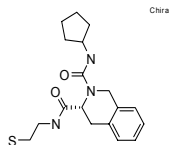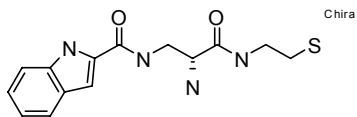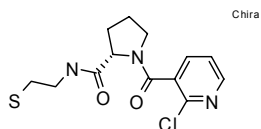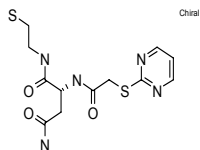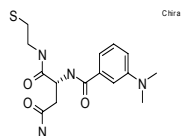

## IL2 K32C Tether Hits

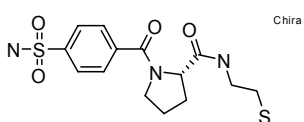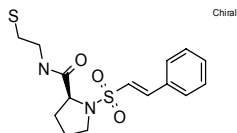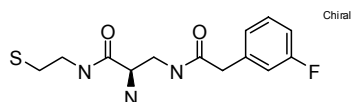

### IL2 N33C Tether Hits

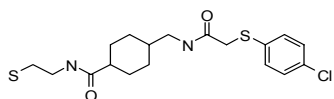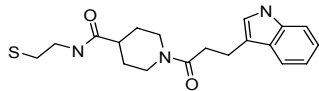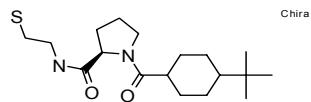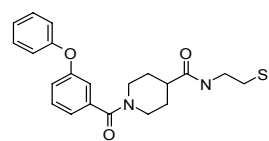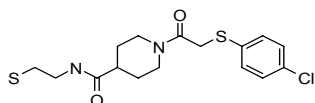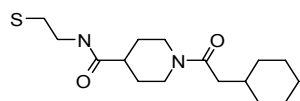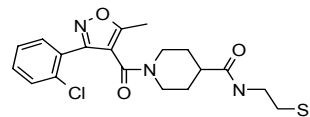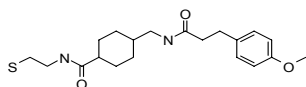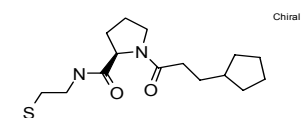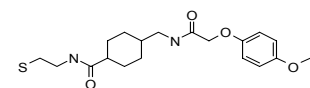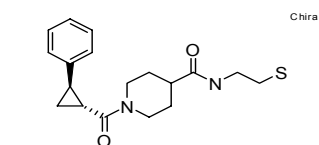

### IL2 N33C Tether Hits

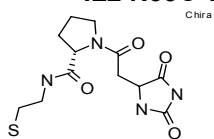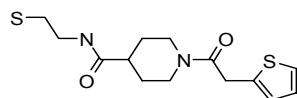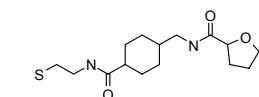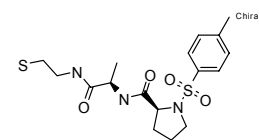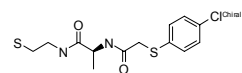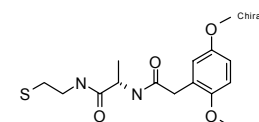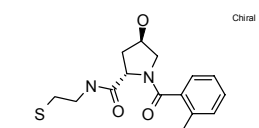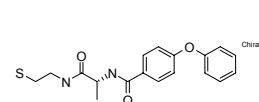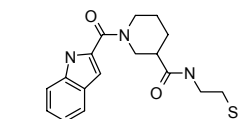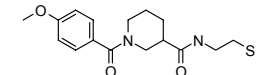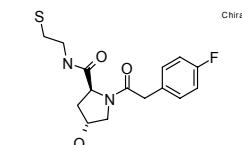

### IL2 N33C Tether Hits

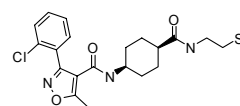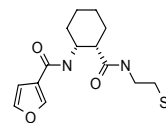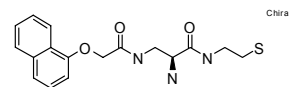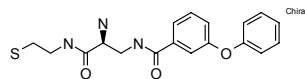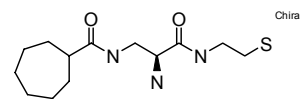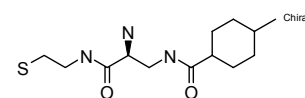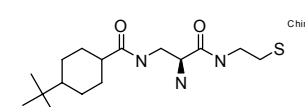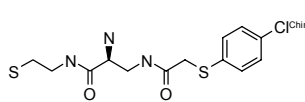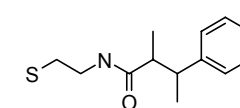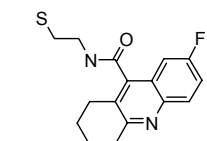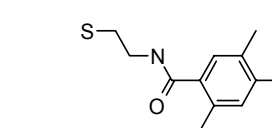

### IL2 N33C Tether Hits

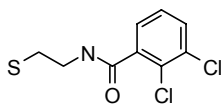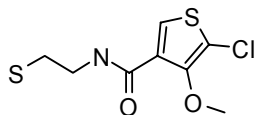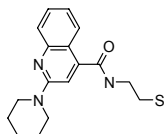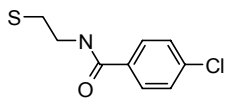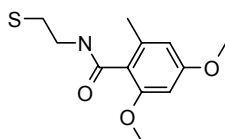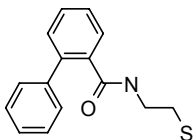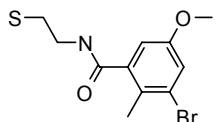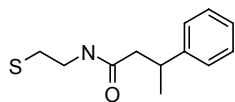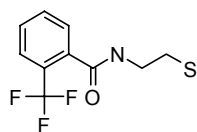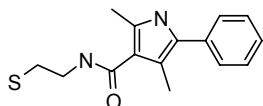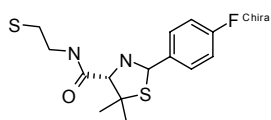

### IL2 N33C Tether Hits

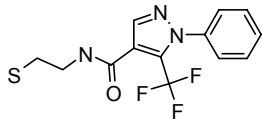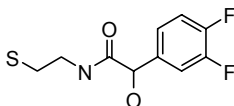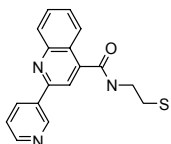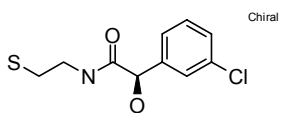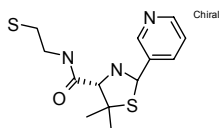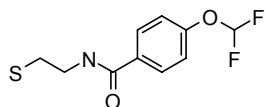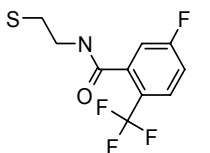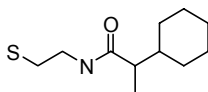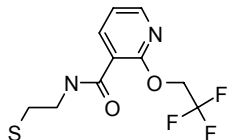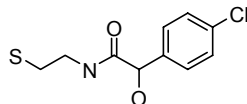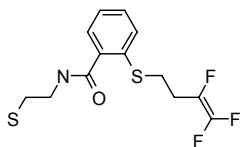

### IL2 N33C Tether Hits

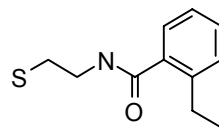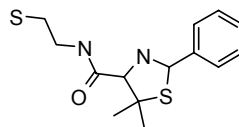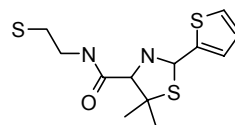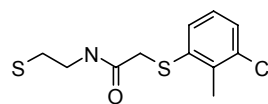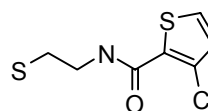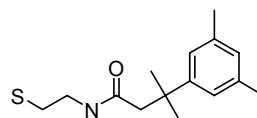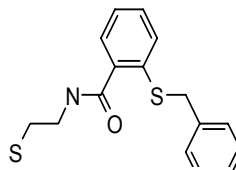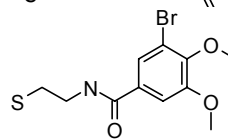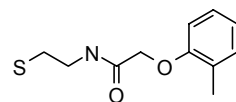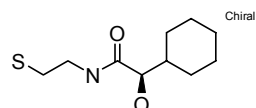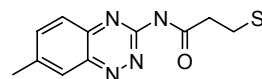





## IL2 K35C Tether Hits

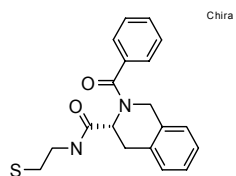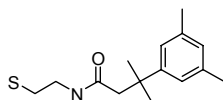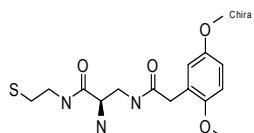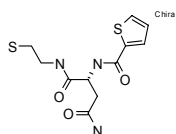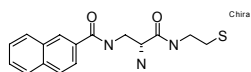

## IL2 Y45C Tether Hits

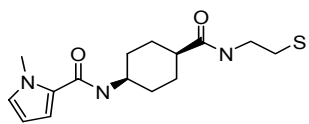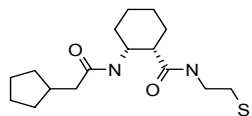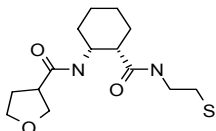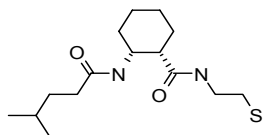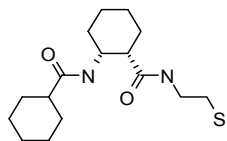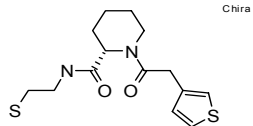

IL2 L72C Tether Hits

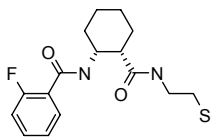

Chira

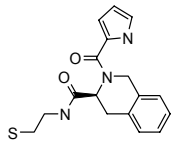

Chira

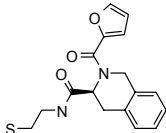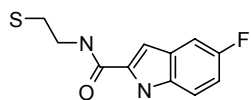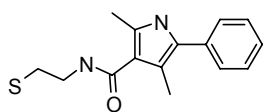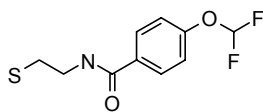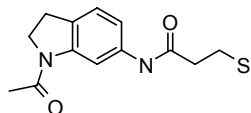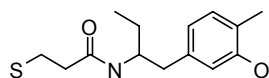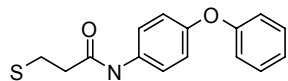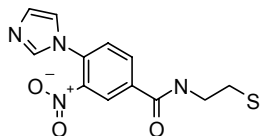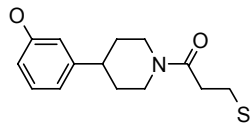

IL2 L72C Tether Hits

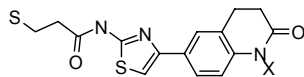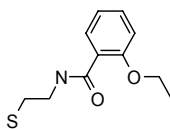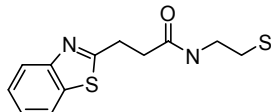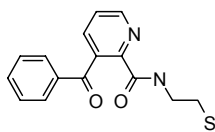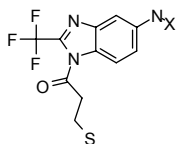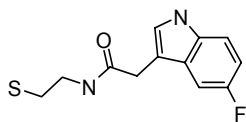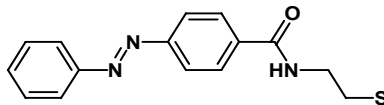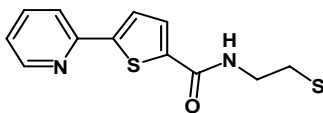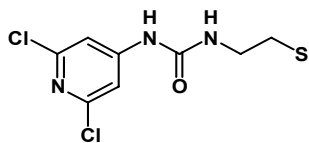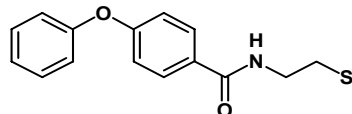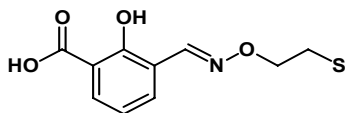

IL2 L72C Tether Hits

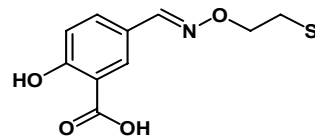

HO

COOH

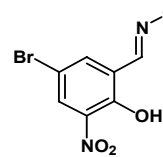

Br

OH

NO<sub>2</sub>

IL2 N77C Tether Hits

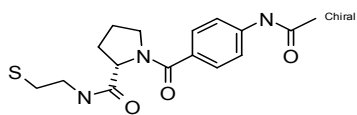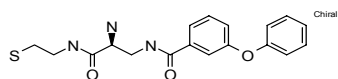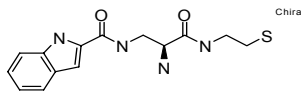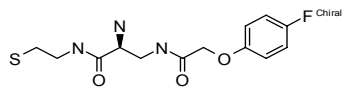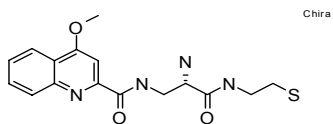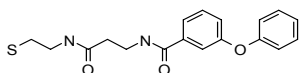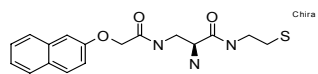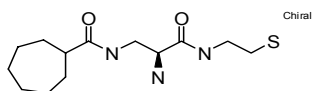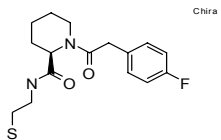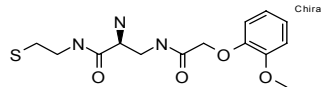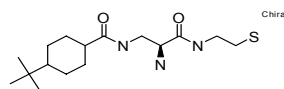

IL2 N77C Tether Hits

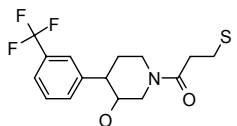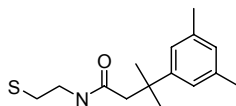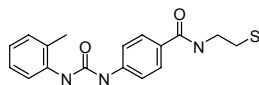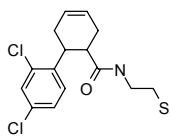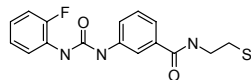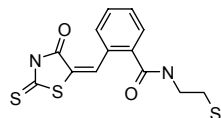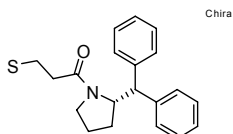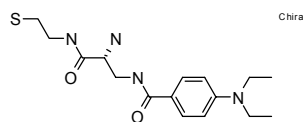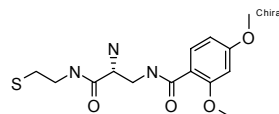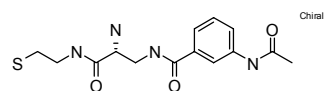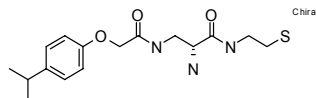

IL2 N77C Tether Hits

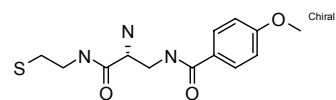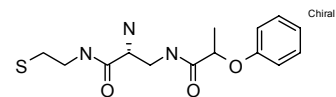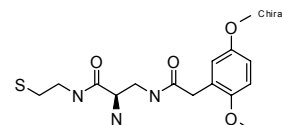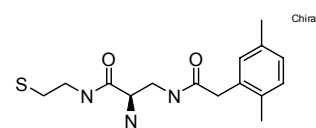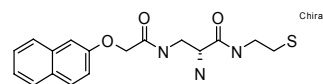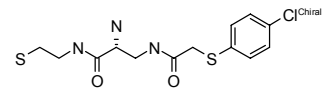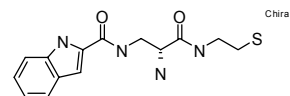

Supplement: pnas_252756299_5.pdf [file pnas_252756299_5.pdf]
