# Supplementary material
Source: PubMed Central journal article supplement (PMC149879)

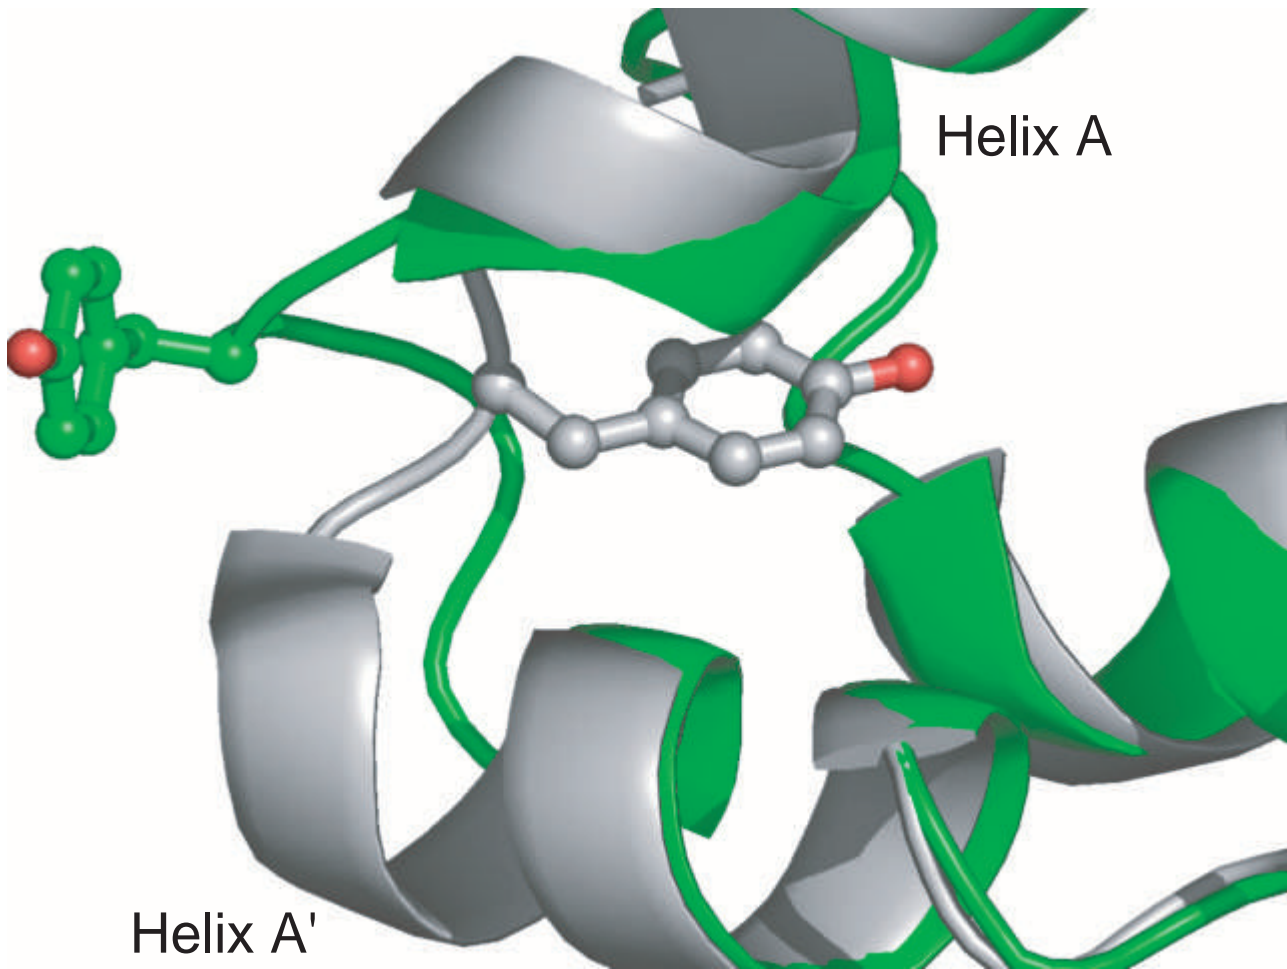

Supplement: pnas_252756299_2.pdf [file pnas_252756299_2.pdf]
